# Supplementary material for: Walking cadence (steps/min) and intensity in 21–40 year olds: CADENCE-adults
Source: PubMed Central journal article supplement (PMC6337834; doi:10.1186/s12966-019-0769-6), 2019-01-17
Supplement: 12966_2019_769_MOESM1_ESM.pdf [file 12966_2019_769_MOESM1_ESM.pdf]

| Cadence Adults Additional File 1: Treadmill bouts speed conversions |              |             |                |
|---------------------------------------------------------------------|--------------|-------------|----------------|
| <b>Bout</b>                                                         | <b>m/min</b> | <b>km/h</b> | <b>miles/h</b> |
| 1                                                                   | 13.4         | 0.8         | 0.5            |
| 2                                                                   | 26.8         | 1.6         | 1.0            |
| 3                                                                   | 40.2         | 2.4         | 1.5            |
| 4                                                                   | 53.6         | 3.2         | 2.0            |
| 5                                                                   | 67.1         | 4.0         | 2.5            |
| 6                                                                   | 80.5         | 4.8         | 3.0            |
| 7                                                                   | 93.9         | 5.6         | 3.5            |
| 8                                                                   | 107.3        | 6.4         | 4.0            |
| 9                                                                   | 120.7        | 7.2         | 4.5            |
| 10                                                                  | 134.1        | 8.0         | 5.0            |
| 11                                                                  | 147.5        | 8.9         | 5.5            |
| 12                                                                  | 160.9        | 9.7         | 6.0            |
